# Supplementary material for: Neospora caninum infection during early pregnancy in cattle: how the isolate influences infection dynamics, clinical outcome and peripheral and local immune responses
Source: PubMed Central journal article supplement (PMC3922688; doi:10.1186/1297-9716-45-10), 2014-01-30

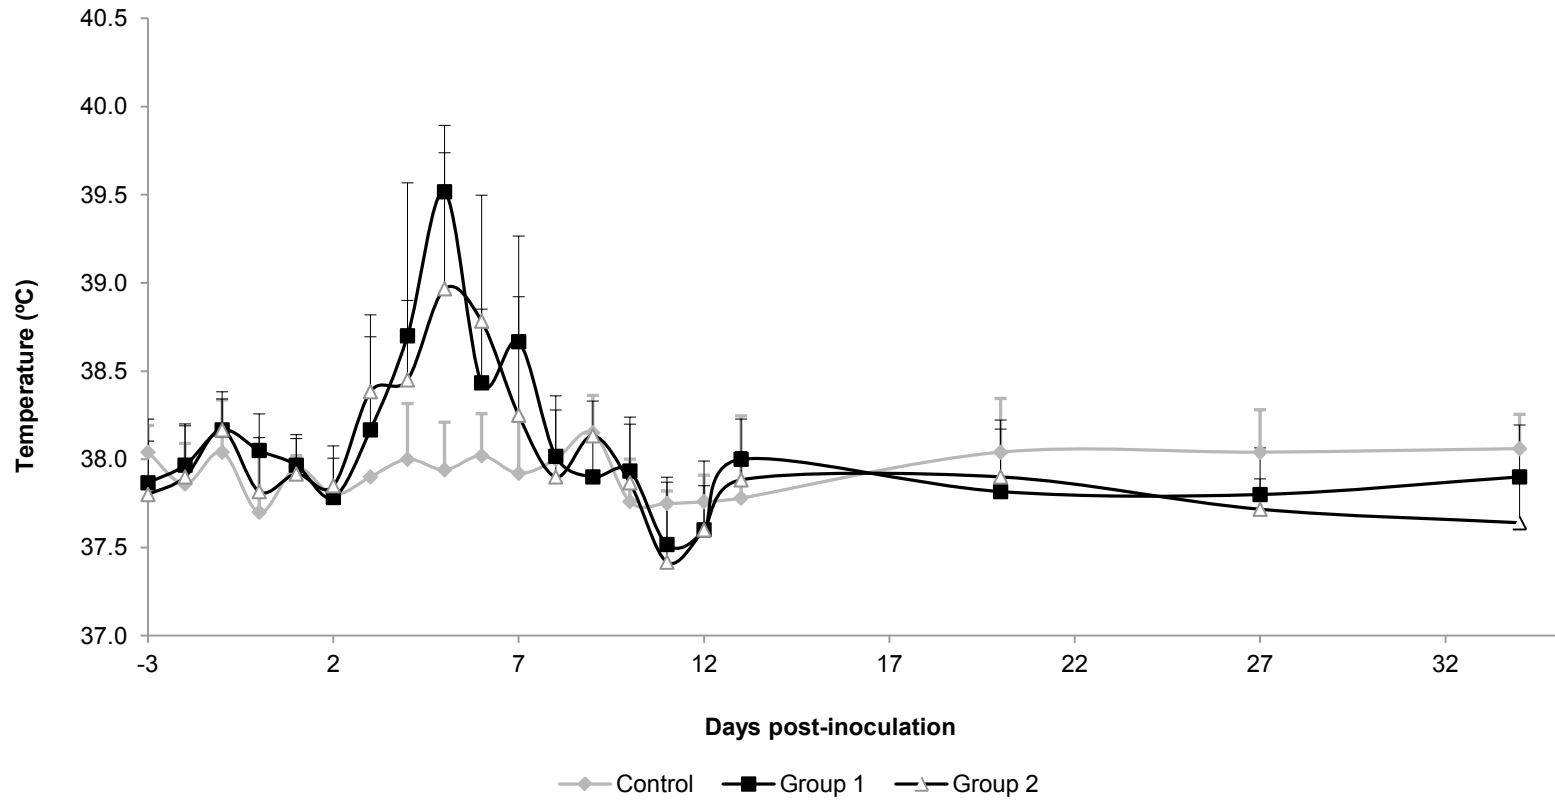

Supplement: 1297-9716-45-10-S3.pdf [file 1297-9716-45-10-S3.pdf]
